# Supplementary material for: Automatic high-frequency measurements of full soil greenhouse gas fluxes in a tropical forest
Source: Copernicus journal article supplement (doi:10.5194/bg-16-785-2019), 2019-02-12
Supplement: Supplementary file 1 [file bg-16-785-2019-supplement.zip]

Archive with 4 entries (4 files):
- SupplementaryFigureS2.pdf
- Supplement.pdf
- SupplementaryFigureS1.pdf
- bg-16-785-2019-supplement-title-page.pdf
