# Supplementary material for: Automatic high-frequency measurements of full soil greenhouse gas fluxes in a tropical forest
Source: Copernicus journal article supplement (doi:10.5194/bg-16-785-2019), 2019-02-12
Supplement: Supplementary file 1 [file bg-16-785-2019-supplement.zip › bg-16-785-2019-supplement-title-page.pdf]

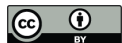

## *Supplement of*

# **Automatic high-frequency measurements of full soil greenhouse gas fluxes in a tropical forest**

**Elodie Alice Courtois et al.**

*Correspondence to:* Elodie Alice Courtois ([elodie.courtois@cnrs.fr](mailto:elodie.courtois@cnrs.fr))

- [bg-16-785-2019-supplement-title-page.pdf](#)
- [Supplement.pdf](#)
- [SupplementaryFigureS1.pdf](#)
- [SupplementaryFigureS2.pdf](#)

The copyright of individual parts of the supplement might differ from the CC BY 4.0 License.
