# Supplementary material for: Automatic high-frequency measurements of full soil greenhouse gas fluxes in a tropical forest
Source: Copernicus journal article supplement (doi:10.5194/bg-16-785-2019), 2019-02-12

### Supplementary File 1: R code for merging Picarro files to include them in Soil Flux pro

```
## to list all the days in a given directory (Picarro makes one directory per day)
ListDay<-list.files()
5 Pfile<-list()
## to concatenate all the hourly file in one file per day
for (j in 1:length(ListDay))
{
  print(j)
10 ListFilesPicarro<-list.files(ListDay[j])
  Data<-read.table(paste(ListDay[j],"/",ListFilesPicarro[1],sep=""))
  for (i in 2:length(ListFilesPicarro))
  {
    temp<-read.table(paste(ListDay[j],"/",ListFilesPicarro[i],sep=""))
15 Data<-rbind(Data, temp)
    print(i)
  }
  Pfile[[j]]<-Data
}
20 ## to concatenante all days and make just one file will all data
MasterData<-Pfile[[1]]
for (k in 2:length(Pfile))
{
  MasterData<-rbind(MasterData,Pfile[[k]])
25 print(k)
}
## to write the table in a way that SFP can read it
write.table(MasterData, "MasterData.dat", quote=F)

30
```

**Supplementary Figure 1:** Comparison of linear (x-axis) and exponential (y-axis) fit of the same measurement for all the fluxes used in the study for (A) CO<sub>2</sub>, (B) CH<sub>4</sub> and (C) N<sub>2</sub>O. The dashed line represents the 1:1 line. High fluxes of all three gases are clearly underestimated using linear fit.

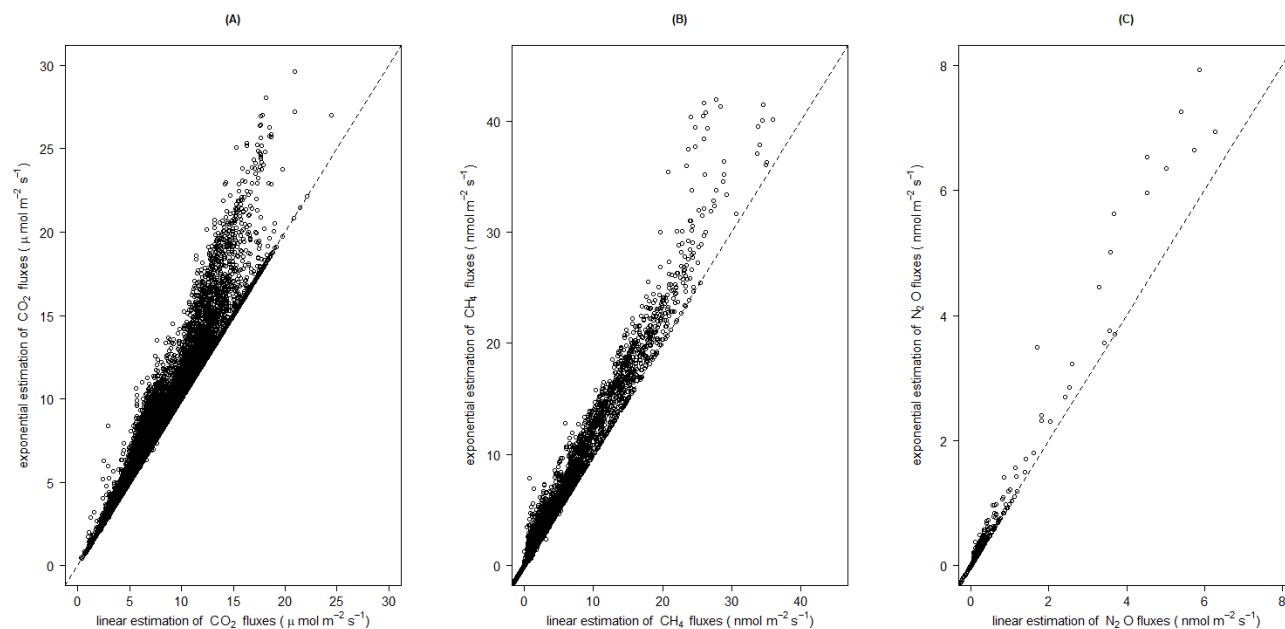

**Supplementary Figure 2:** Relationship between soil surface humidity and (A) CO<sub>2</sub>, (B) CH<sub>4</sub> and (C) N<sub>2</sub>O fluxes over the study period.

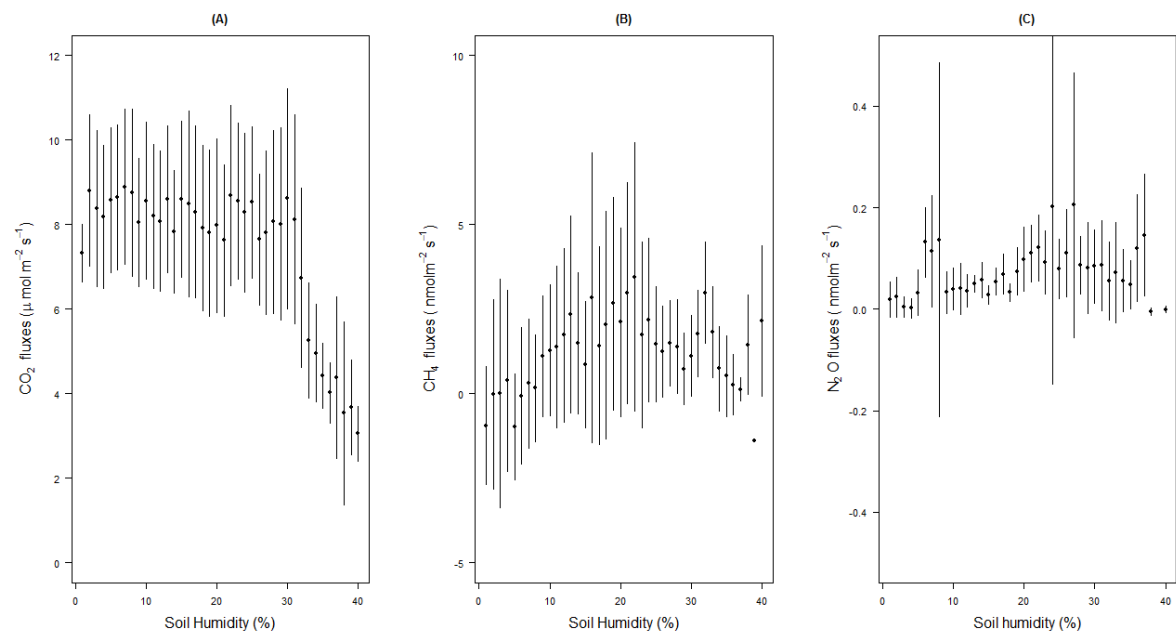

Supplement: Supplementary file 1 [file bg-16-785-2019-supplement.zip › Supplement.pdf]
