# Supplementary figures and images for: Automatic high-frequency measurements of full soil greenhouse gas fluxes in a tropical forest
Source: Copernicus journal article supplement (doi:10.5194/bg-16-785-2019), 2019-02-12

(A)

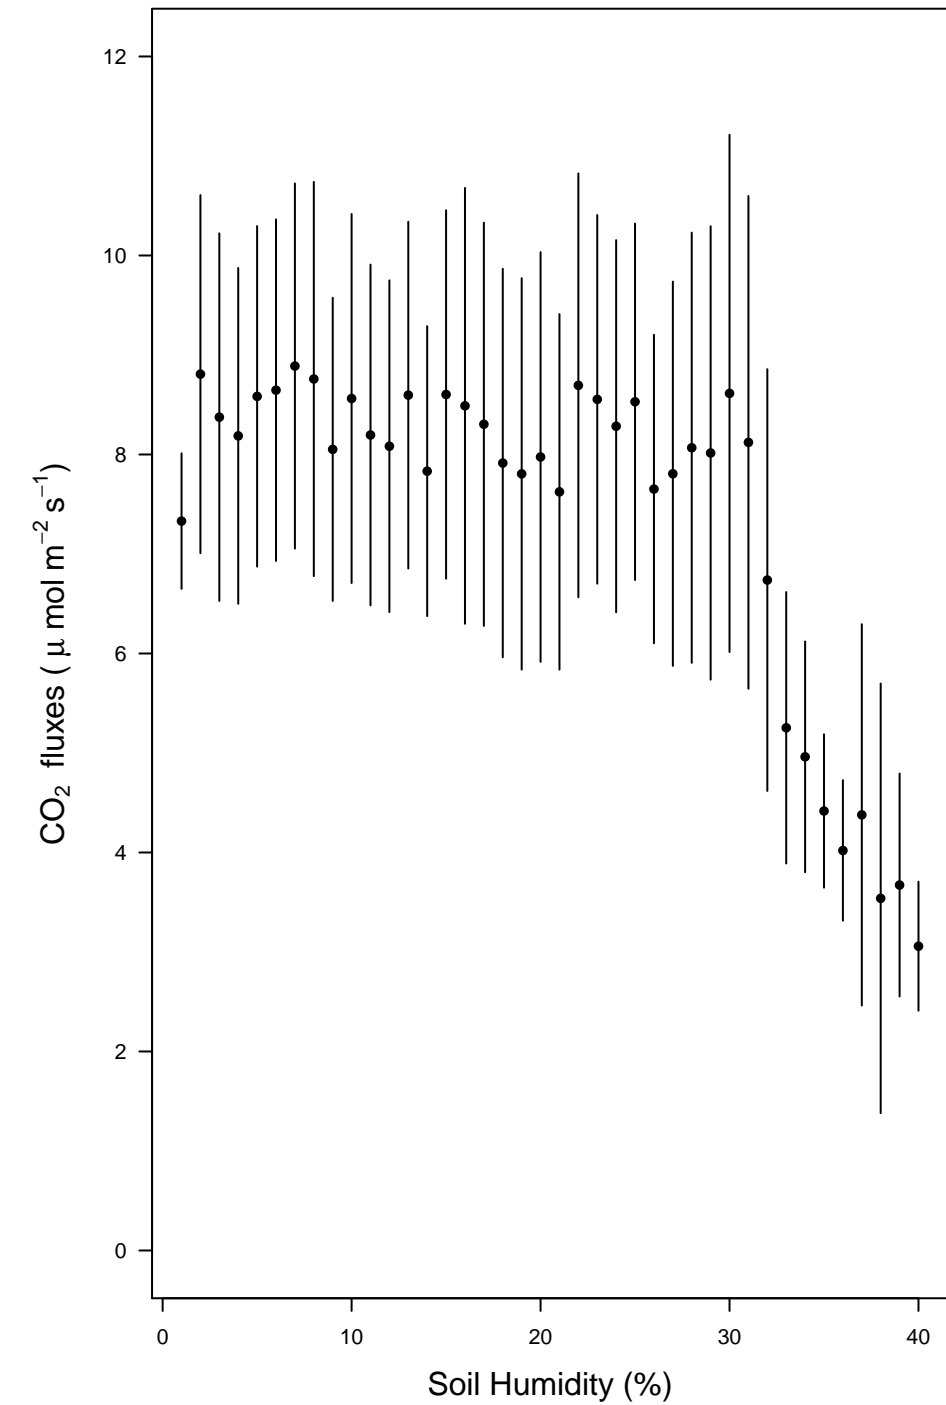

(B)

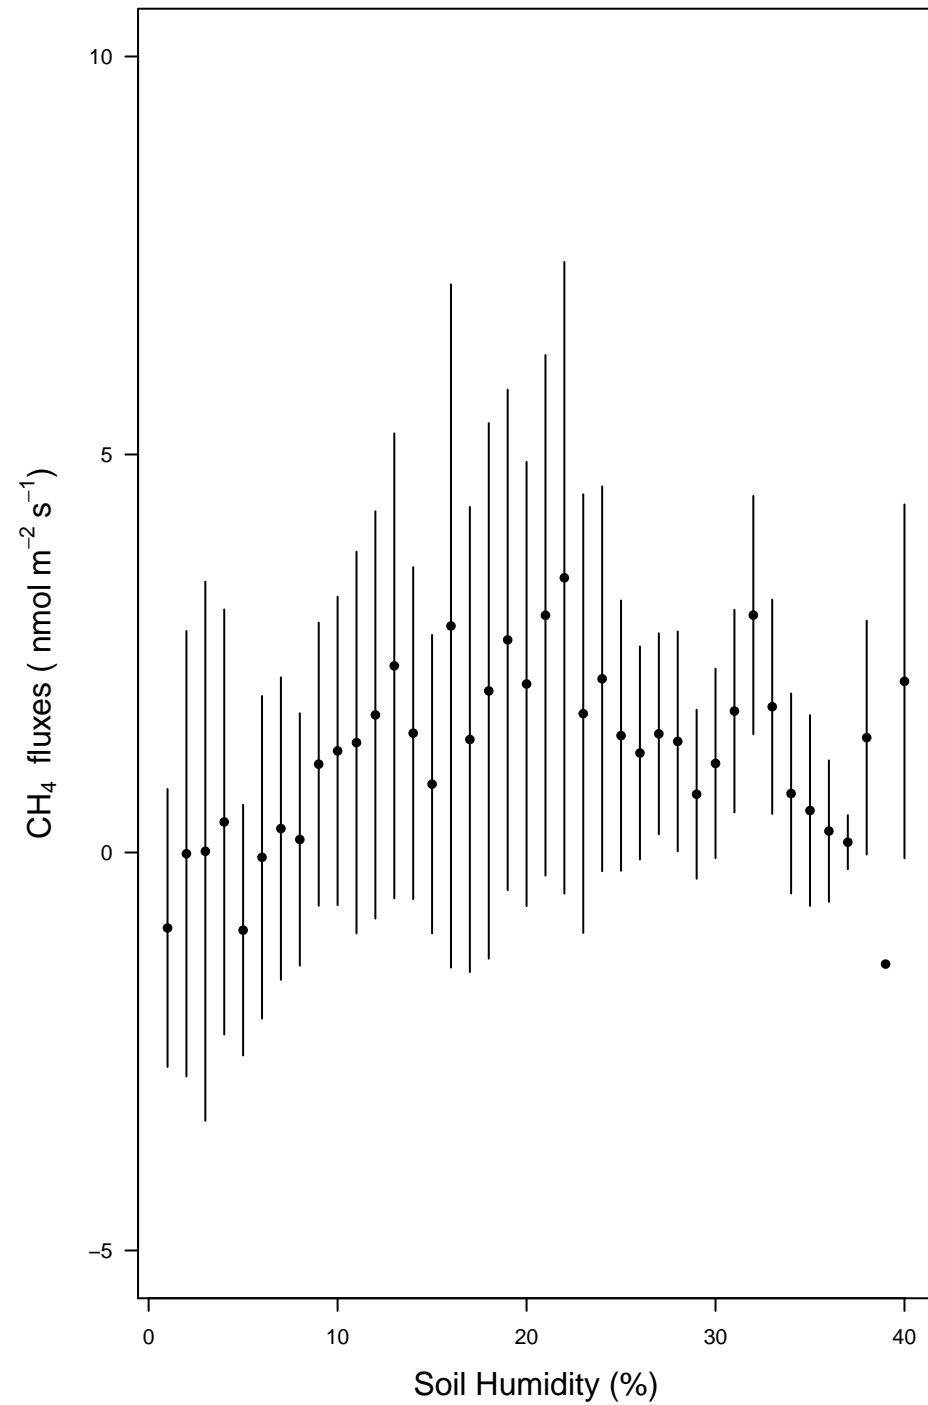

(C)

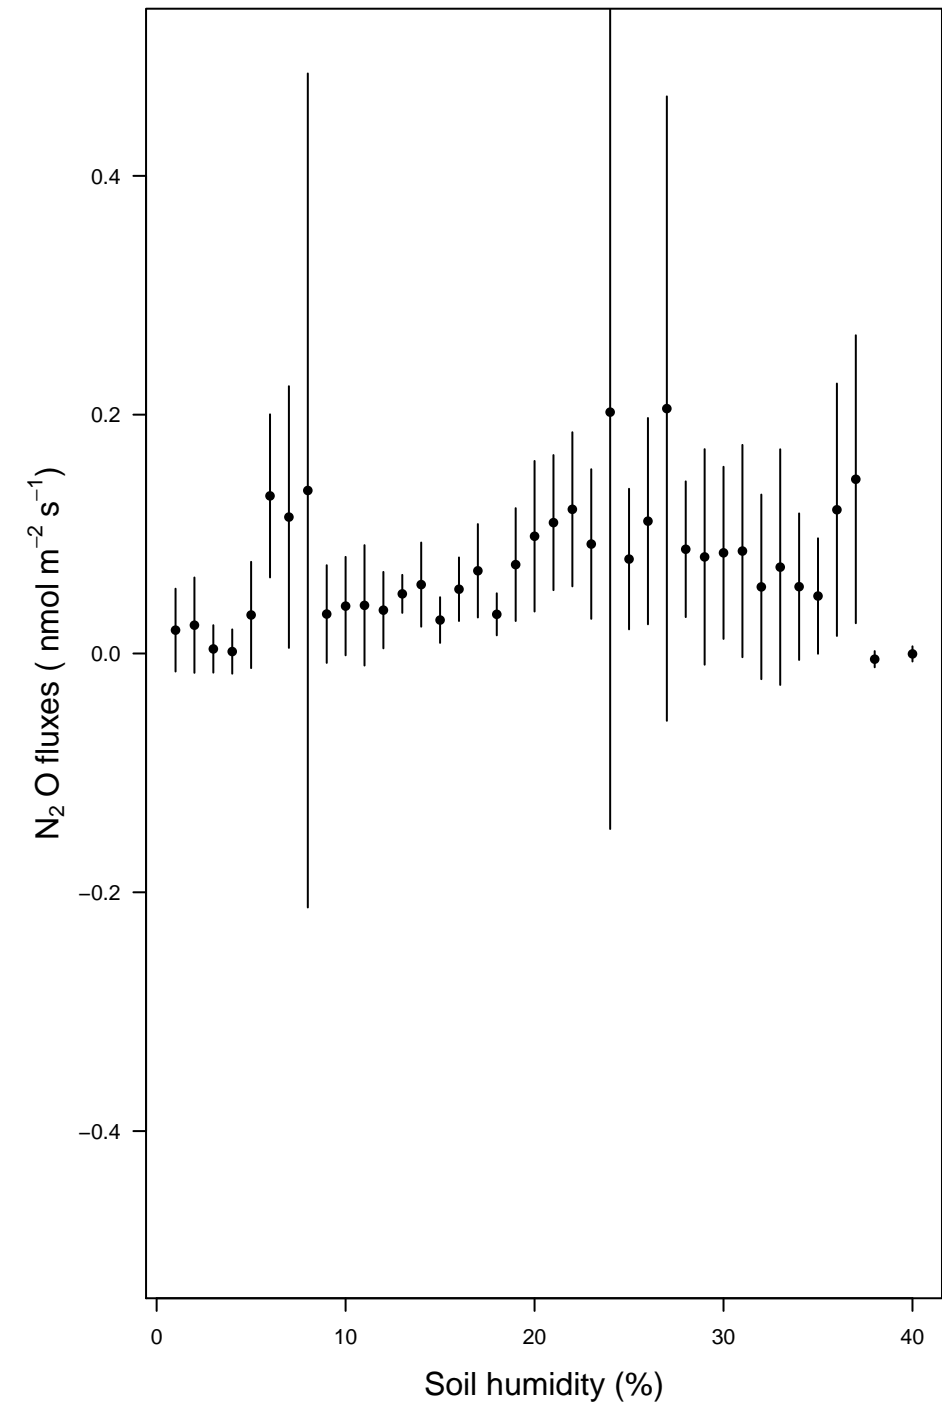

Supplement: Supplementary file 1 [file bg-16-785-2019-supplement.zip › SupplementaryFigureS2.pdf]

**(A)**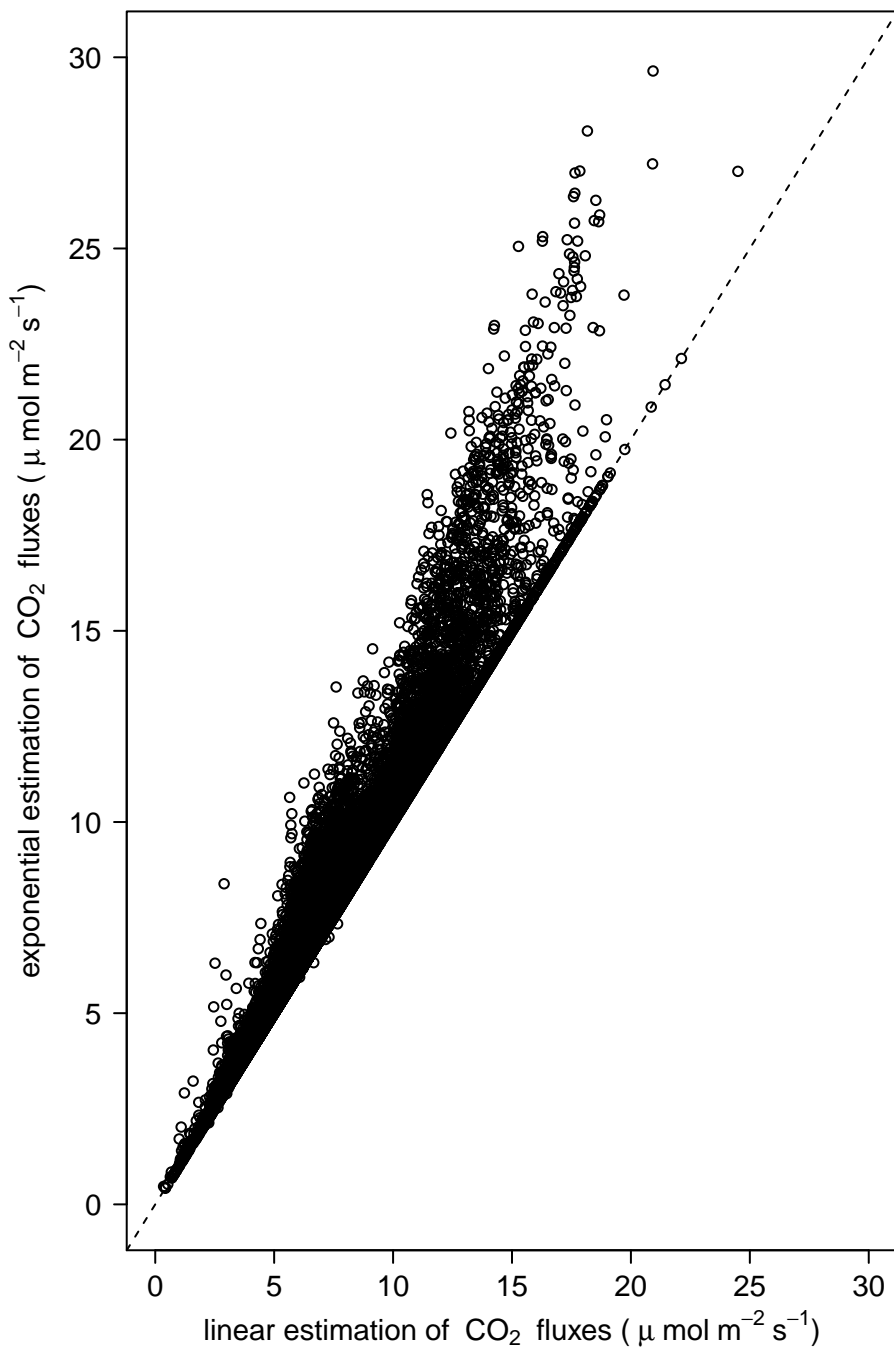**(B)**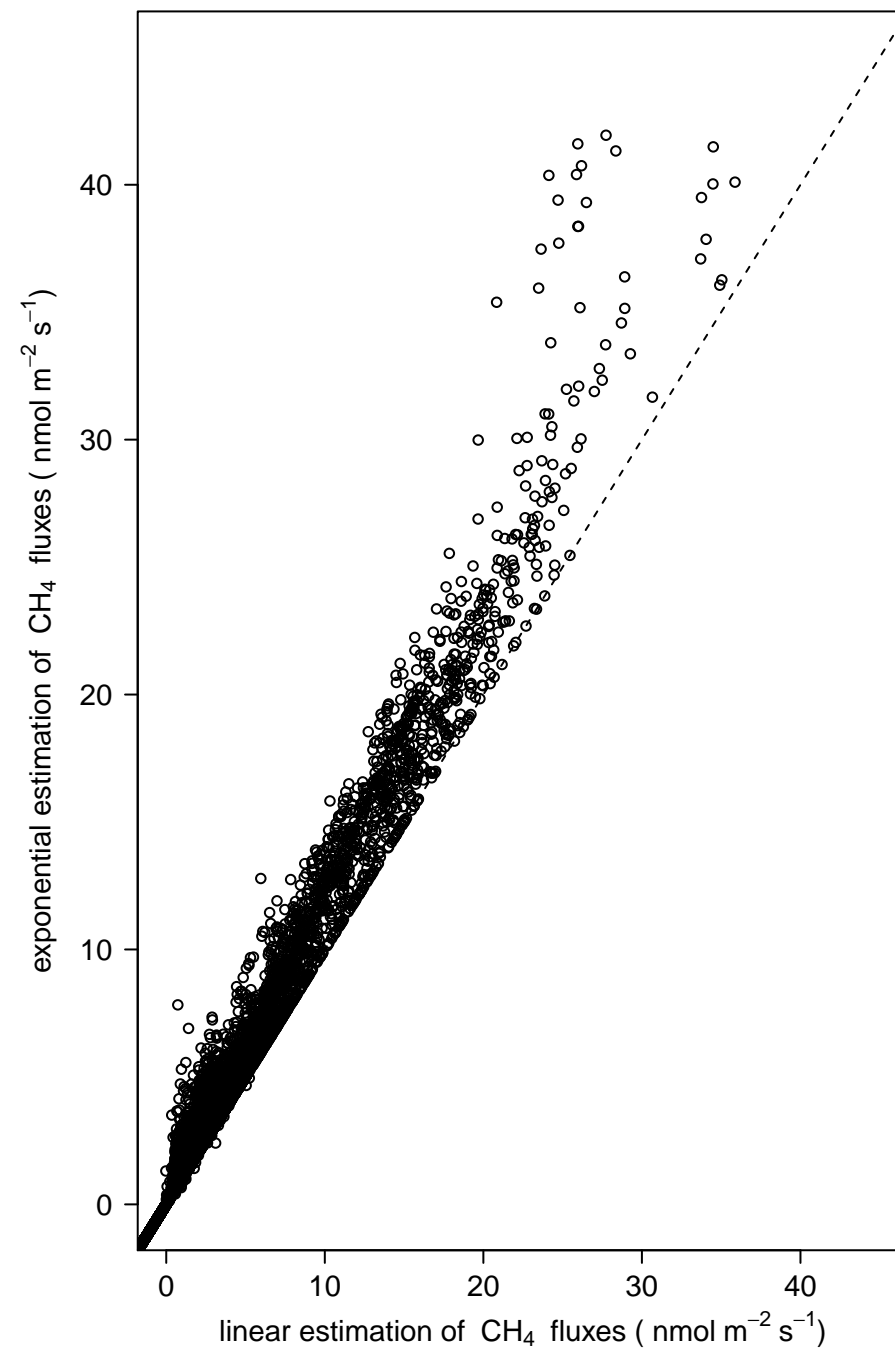**(C)**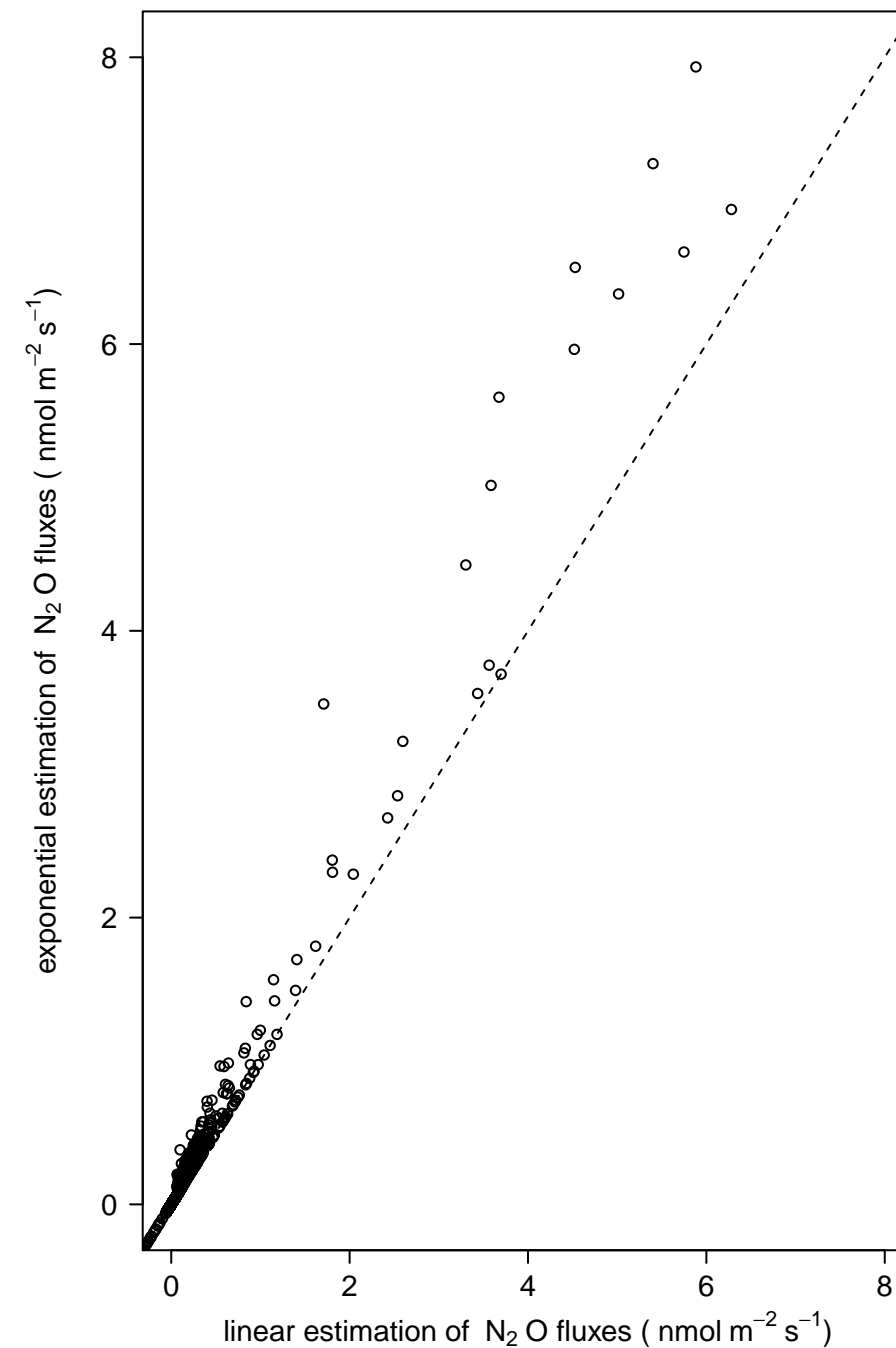

Supplement: Supplementary file 1 [file bg-16-785-2019-supplement.zip › SupplementaryFigureS1.pdf]
